# Supplementary material
Source: ML conference proceedings conference paper supplement (https://openaccess.thecvf.com/content/ICCV2023/html/Zhao_Incremental_Generalized_Category_ICCV_2023_paper.html)
Supplement: Supplementary file 1 [file Zhao_Incremental_Generalized_Category_ICCV_2023_supplemental.zip]

Archive with 2 entries (2 files):
- 05348-supp.pdf
- __MACOSX/._05348-supp.pdf
